# Supplementary material for: Comparison of Immune Microenvironment Between Colon and Liver Metastatic Tissue in Colon Cancer Patients with Liver Metastasis
Source: Springer Nature journal article supplement (doi:10.1007/s10620-020-06203-8), 2020-03-19
Supplement: MOESM1 [file 17815470]

Images were digitally captured using an Olympus BX51 microscope, 3 fields taken in central tumor and IM for each sample and quantified using Image-Pro Plus (IPP) 6.0 (Diagnostic Instruments, USA). Twenty medium power fields (20×) were analyzed per section.

**Supplementary figure 1. Example of automatic counting of positive stained cells.**

A B


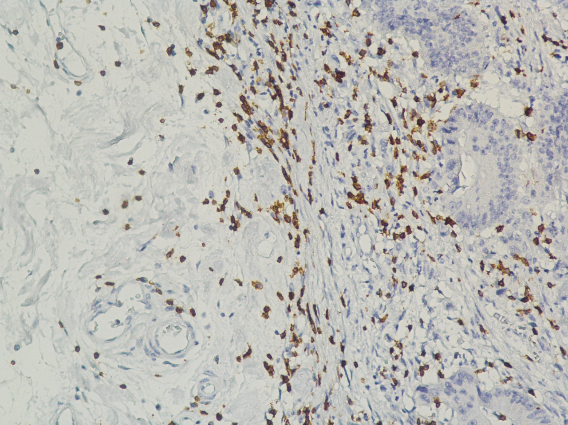

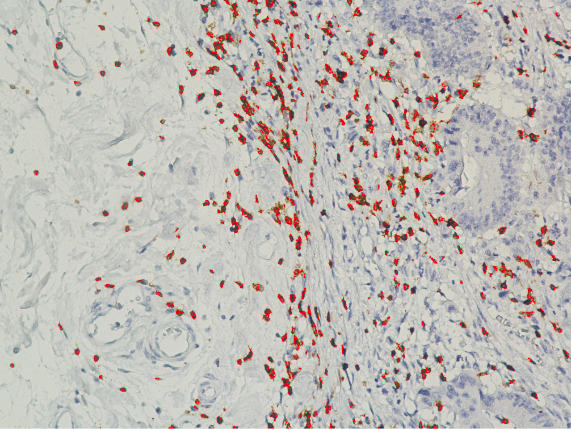


A. Image of an invasive margin of primary tumor with CD3+ staining. B. Image after setting histogram based at segmentation, RGB ranged 94-137 and area ranged from 5-1000 in measurement setting.

**Supplementary Table 1. Correlation between IPP and manual method**

| Site | IM in primary tumor | | IM in primary tumor | | CT in primary tumor | | CT in liver metastasis | | IM in liver metastasis | |
| --- | --- | --- | --- | --- | --- | --- | --- | --- | --- | --- |
| Marker | **CD3** | | **CD8** | | **CD8** | | **CD8** | | **CD8** | |
| Method | **IPP** | **manual** | **IPP** | **manual** | **IPP** | **manual** | **IPP** | **manual** | **IPP** | **manual** |
| Correlation Coefficient | **.648** | | **.384** | | **.438** | | **.601** | | **.257** | |
| N | **40** | | **35** | | **36** | | **40** | | **39** | |

P-values were obtained from Spearman's rho test

IPP: Image-Pro Plus.

**Supplemental Table 2. Comparison of immune markers expression between CT and IM regions using automatic counting data via IPP**

| Primary tumor | N | | Center tumor | | | | | |  | | Invasive margin | | | | | | P value |
| --- | --- | --- | --- | --- | --- | --- | --- | --- | --- | --- | --- | --- | --- | --- | --- | --- | --- |
| mean | | median | | 25%,75% | |  | | mean | | median | | 25%,75% | |  |
| CD3 | 41 | | 134.11±190.26 | | 71.67 | | 12.33,172.00 | |  | | 517.94±531.12 | | 352.67 | | 157.33,714.50 | | <0.001 |
| CD8 | 35 | | 85.76±142.54 | | 34.17 | | 10.00,88.25 | |  | | 374.97±361.16 | | 272.00 | | 187.00,453.00 | | <0.001 |
| Liver metastasis | | N | | Center tumor | | | | | |  | | Invasive margin | | | | | P value |
| mean | | median | | 25%,75% | |  | | mean | | median | | 25%,75% |  |
| CD3 | | 19 | | 111.86±150.71 | | 65.33 | | 33.67,114.33 | |  | | 1463.65±481.51 | | 1511.67 | | 1083.00,1674.33 | <0.001 |
| CD8 | | 41 | | 84.00±127.70 | | 40.33 | | 10.42,112.50 | |  | | 451.52±228.76 | | 368.00 | | 277.67,571.00 | <0.001 |
|  | |  | |  | |  | |  | |  | |  | |  | |  |  |

P-values were obtained from Wilcoxon's signed rank test.

IPP: Image-Pro Plus; CT: center tumor; IM: invasive margin.

**Supplemental Table 3. Expression of immune markers in primary tumor and hepatic metastases lesions using automatic counting data via IPP**

| Center tumor | | N | | Primary tumor | | | |  | | Hepatic metastases | | | | P value | |
| --- | --- | --- | --- | --- | --- | --- | --- | --- | --- | --- | --- | --- | --- | --- | --- |
| mean | median | | 25%,75% |  | | mean | median | 25%,75% | |  | |
| CD3 | | 41 | | 134.11±190.26 | 71.67 | | 12.33,172.00 |  | | 111.86±150.71 | 65.33 | 33.67,114.33 | | 0.088 | |
| CD8 | | 35 | | 85.76±142.54 | 34.17 | | 10.00,88.25 |  | | 84.00±127.70 | 40.33 | 10.42,112.50 | | 0.225 | |
| Invasive margin | | N | | Primary tumor | | | |  | | Hepatic metastases | | | | P value | |
| mean | median | | 25%,75% |  | | mean | median | 25%,75% | |  | |
| CD3 | | 19 | | 517.94±531.12 | 352.67 | | 157.33,714.50 |  | | 1463.65±481.51 | 1511.67 | 1083.00,1674.33 | | 0.001 | |
| CD8 | | 35 | | 374.97±361.16 | 272.00 | | 187.00,453.00 |  | | 451.52±228.76 | 368.00 | 277.67,571.00 | | 0.098 | |
|  |  | |  | |  |  | |  |  | |  |  |  | |

**P-values were obtained from Wilcoxon's signed rank test.**

IPP: Image-Pro Plus
